1                   **Comprehensive Evaluation of Clonal Hematopoiesis and Mosaic Loss of Y**  
2                   **Chromosome in Cardiovascular Risk: A Thorough Analysis in prospective studies**

3  
4 Fawaz S<sup>1\*</sup>, MD; Marti S<sup>2\*</sup>, PharmD; Dufossée M<sup>3\*</sup> MSc; Pucheu Y<sup>1</sup>, MD; Gaufroy A<sup>1</sup>, MD;  
5 Broitman J<sup>1</sup>, MD ; Bidet A<sup>2</sup>, PharmD, Soumaré A<sup>4</sup> PhD, Munsch G<sup>4</sup> PhD, Tzourio C<sup>4</sup> MD PhD,  
6 Debette S<sup>4</sup> MD PhD, Trégouët DA<sup>4</sup> PhD, James C<sup>2,3</sup>, MD PhD; Mansier O<sup>2,3§</sup>, PharmD PhD ;  
7 Couffinhal T<sup>1,3§</sup> MD PhD

8  
9 <sup>1</sup> CHU de Bordeaux, Service des Maladies Coronaires et Vasculaires, F-33600 Pessac,  
10 France

11 <sup>2</sup> CHU de Bordeaux, Laboratoire d'Hématologie, F-33600 Pessac, France

12 <sup>3</sup> Univ. Bordeaux, INSERM, Biologie des maladies cardiovasculaires, U1034, F-33600  
13 Pessac, France

14 <sup>4</sup> Univ. Bordeaux, Bordeaux Population Health Research Center, INSERM, UMR\_S 1219, F-  
15 33076, Bordeaux, France

16 \* These authors contributed equally to this work

17 § These authors contributed equally to this work

18

19 ***Short title: CHIP do not highly increase the risk of MI even when associated with***  
20 ***mLOY***

21

22 ***Corresponding authors***

23 Pr Thierry Couffinhal.

24 [thierry.couffinhal@inserm.fr](mailto:thierry.couffinhal@inserm.fr)

25 Dr Olivier Mansier.

26 [olivier.mansier@inserm.fr](mailto:olivier.mansier@inserm.fr)

27 Inserm U1034 -1, avenue de Magellan, Hôpital Haut Lévêque - 33604 Pessac - France

28 ***Total word count: 4192***



30 **Abstract**

31 **Background:** Clonal hematopoiesis of indeterminate potential (CHIP) was initially linked to a  
32 twofold increase in atherothrombotic events. However, recent investigations have revealed a  
33 more nuanced picture, suggesting that CHIP may confer only a modest rise in Myocardial  
34 Infarction (MI) risk. This observed lower risk might be influenced by yet unidentified factors  
35 that modulate the pathological effects of CHIP. Mosaic loss of Y chromosome (mLOY), a  
36 common marker of clonal hematopoiesis in men, has emerged as a potential candidate for  
37 modulating cardiovascular risk associated with CHIP. In this comprehensive study, we aimed  
38 to ascertain the precise risk linked to each somatic mutation or mLOY and explore whether  
39 mLOY could exert an influence on the cardiovascular risk associated with CHIP.

40 **Methods:** We conducted a meticulous examination for the presence of CHIP and mLOY  
41 using targeted high-throughput sequencing and digital PCR in a cohort of 446 individuals.  
42 Among them, 149 patients from the CHAth study had experienced a first myocardial  
43 infarction (MI) at the time of inclusion (MI(+) subjects), while 297 individuals from the 3-city  
44 cohort had no history of cardiovascular events (CVE) at the time of inclusion (MI(-) subjects).  
45 All subjects underwent thorough cardiovascular phenotyping, including a direct assessment  
46 of atherosclerotic burden. Our investigation aimed to determine whether mLOY could  
47 modulate inflammation, atherosclerosis burden, and atherothrombotic risk associated with  
48 CHIP.

49 **Results:** CHIP and mLOY were detected with a substantial prevalence (45.1% and 37.7%,  
50 respectively), and their occurrence was similar between MI(+) and MI(-) subjects. Notably,  
51 nearly 40% of CHIP(+) male subjects also exhibited mLOY. Interestingly, neither CHIP nor  
52 mLOY independently resulted in significant increases in plasma hsCRP levels,  
53 atherosclerotic burden, or MI incidence. Moreover, mLOY did not amplify or diminish  
54 inflammation, atherosclerosis, or MI incidence among CHIP(+) male subjects. Conversely, in

55 MI(-) male subjects, CHIP heightened the risk of MI over a five-year period, particularly in  
56 those lacking mLOY.

57 **Conclusion:** Our study highlights the high prevalence of CHIP and mLOY in elderly  
58 individuals. Importantly, our results demonstrate that neither CHIP nor mLOY in isolation  
59 substantially contribute to inflammation, atherosclerosis, or MI incidence. Furthermore, we  
60 find that mLOY does not exert a significant influence on the modulation of inflammation,  
61 atherosclerosis burden, or atherothrombotic risk associated with CHIP. However, CHIP may  
62 accelerate the occurrence of MI, especially when unaccompanied by mLOY. These findings  
63 underscore the complexity of the interplay between CHIP, mLOY, and cardiovascular risk,  
64 suggesting that large-scale studies with thousands more patients may be necessary to  
65 elucidate subtle correlations.

66  
67 **Keywords:** Clonal hematopoiesis of indeterminate potential (CHIP); Mosaic loss of Y  
68 chromosome; myocardial infarction; inflammation; atheromatous burden.

69  
70 ***Author approval***

71 All authors have seen and approved the manuscript.

72 ***Disclosures***

73 The authors report no conflict of interest.

74 ***Sources of Funding***

75 This study was supported by the Fondation Cœur & Recherche (the Société Française  
76 de Cardiologie), the Fédération Française de Cardiologie, ERA-CVD (« CHEMICAL »  
77 consortium, JTC 2019) and the Fondation Université de Bordeaux. The laboratory of  
78 Hematology of the University Hospital of Bordeaux benefitted of a convention with the  
79 Nouvelle Aquitaine Region (2018-1R30113-8473520) for the acquisition of the Nextseq  
80 550Dx sequencer used in this study.

81 **Registration:** URL: <https://clinicaltrials.gov>; Unique identifier: NCT04581057.



83 **Introduction**

84 Atherothrombosis is the main cause of death worldwide. Traditional cardiovascular risk  
85 factors (CVRF), such as diabetes, smoking, dyslipidemia, hypertension, explain 70 to 75% of  
86 cardiovascular events suffered by patients. However, a significant part of these events  
87 remains unexplained given that 25 to 30% of people without any evident cause can present  
88 an atherosclerotic cardiovascular event (CVE), whereas not all high-risk subjects (according  
89 to traditional CVFR) experience such an event.<sup>1</sup>

90 Recently, clonal hematopoiesis of indeterminate potential (CHIP) has emerged as a potential  
91 new risk factor of cardiovascular diseases.<sup>2</sup> This condition results from the acquisition by a  
92 hematopoietic stem cell of somatic mutations in leukemia-driver genes, leading to clonal  
93 expansion of a population of hematopoietic cells without any clinical or biological sign of  
94 hematological malignancy. The definition of CHIP proposed to date, requires the detection of  
95 the mutation at a variant allele frequency (VAF) of more than 2%, representing a proportion  
96 of mutated cells of more than 4%.<sup>3</sup> The most commonly mutated genes in CHIP are *DNA*  
97 *Methyltransferase 3A (DNMT3A)* and *Ten Eleven Translocation 2 (TET2)*. In 2014, Jaiswal *et*  
98 *al* showed that CHIP was associated with a decreased survival mainly because of an  
99 increased atherothrombotic mortality. In particular, they observed a 2.0 fold-increased risk of  
100 myocardial infarction (MI) and a 2.6-fold increased risk of ischemic stroke.<sup>2</sup> In 2017, these  
101 data were confirmed, showing a 1.9-fold increased risk of coronary heart disease in the  
102 presence of CHIP, independently of traditional CVRF.<sup>4</sup> At the same time, a causative role of  
103 CHIP in inducing atherosclerosis has been demonstrated in animal models through the  
104 induction of a proinflammatory state.<sup>4,5</sup> More recently, Kessler *et al* showed in 454 803  
105 subjects from the UK Biobank that the association of CHIP with atherothrombotic events was  
106 restricted to high VAF clones (*ie*  $\geq 10\%$ ) with a much lower risk than initially demonstrated  
107 (HR=1.11).<sup>6</sup> But even with these criteria, no association between CHIP and atherothrombotic  
108 events was found in a validation cohort of 173 585 subjects,<sup>6</sup> which has also been suggested  
109 in another work studying several hundred thousand subjects.<sup>7</sup> Thus, the impact of CHIP on  
110 atherothrombosis in humans is not totally evident, possibly because of the existence of yet

111 unidentified modulating factors that could potentiate or counteract the effect of CHIP. For  
112 example, the p.Asp358Ala variant of the IL6 receptor gene has been shown to decrease the  
113 atherothrombotic risk associated with CHIP.<sup>8,9</sup> However, the impact other genetic variants on  
114 the cardiovascular risk associated with CHIP remains unknown.

115 Gain or loss of chromosomes in hematopoietic cells appears to be as frequent as the  
116 acquisition of somatic mutations during aging.<sup>10</sup> In particular, mosaic loss of chromosome Y  
117 (mLOY) has been shown to be frequent in male subjects without evidence of hematological  
118 malignancy.<sup>11,12</sup> mLOY was associated with cardiovascular diseases,<sup>13,14</sup> and can be  
119 detected in a rather high proportion of subjects with CHIP.<sup>15,16</sup> Finally, while *TET2* mutations  
120 promote inflammation and atherosclerosis in mouse models,<sup>4</sup> mLOY was shown to switch  
121 macrophages from a pro-inflammatory to a pro-fibrotic phenotype.<sup>14</sup> Thus, because of their  
122 opposite effect on macrophages phenotype, mLOY could balance the effect of CHIP  
123 regarding the induction of inflammation and thus decrease the development of  
124 atherosclerosis and the resulting atherothrombotic risk. We thus hypothesized that mLOY  
125 could modulate the effect of CHIP in inducing inflammation, atherosclerosis and triggering  
126 atherothrombotic events.

127 In this study, we used sensitive technics to determine the prevalence of both CHIP and  
128 mLOY in 2 cohorts of subjects. We sought to determine whether CHIP and mLOY  
129 significantly increase the cardiovascular risk separately. We also searched to determine in  
130 humans whether mLOY could impact the effect of CHIP on inflammation, atherosclerosis  
131 burden or atherothrombotic risk.

132

133 **Methods**

134 **Patients**

135 For this study, we recruited 446 patients: 149 with a first MI and 297 without a MI or other  
136 CVE at inclusion. The 149 subjects with a MI were enrolled in the CHAth study between  
137 March 2019 and October 2021 (MI(+) subjects). The main eligibility criterion was suffering  
138 from a first MI of atherosclerosis origin after 75 years of age without evidence of  
139 hematological malignancy (Supplementary Figure S1). They were included between 4+/-2  
140 months after the acute event, in order to assess their basal inflammatory state. In the  
141 presence of any clinical sign or factor associated with inflammation, the appointment was  
142 reported in order not to skew biological and genetic data. Additionally, we ensured that the  
143 subjects had not been vaccinated against SARS-Cov2 within 15 days of enrollment. The  
144 study was approved by the institutional review board (IRDCB 2019-A02902-05), and  
145 registered (<https://www.clinicaltrials.gov>: NCT04581057). All participants gave written  
146 informed consent before inclusion in the study. Eligibility and exclusion criteria are more  
147 detailed in the Supplementary Methods.

148 As a control cohort, we selected subjects without any history of CVE at inclusion in the 3-city  
149 (3C) study cohort (MI(-) subjects, Supplementary Figure S1).<sup>17</sup> The 3C study is a prospective  
150 study that enrolled 9294 subjects of 65 years or more who were selected upon electoral lists.  
151 These subjects were followed for several years (up to 12 years) to detect the development of  
152 dementia from a vascular origin. As such, they benefitted from a stringent cardiovascular  
153 follow-up, with adjudication of all cardiovascular events (in particular occurrence of MI).  
154 Among these subjects, we selected the 297 subjects who did not present any CVE before  
155 inclusion. Seventy-nine of them presented a MI during follow-up. The remaining 218 subjects  
156 had no atherothrombotic event during follow up, and were matched on age, sex and CVRF  
157 with those who had a MI during follow up (Supplementary Figure S1).

158

159 **Clinical and biological parameters measured at inclusion**



160 In MI(+) subjects, a routine cardiovascular evaluation was performed at inclusion (between 2  
161 and 7 month after MI occurrence). Subjects were asked about presence of dyspnea or  
162 angina, evaluated with NYHA and CCS scales. Information was obtained from medical  
163 records about a potential recurrence of a cardiovascular event since the index event (new  
164 MI, coronary revascularization, stroke, hospitalization for acute heart failure). Traditional  
165 cardiovascular risk factors were noted. Routine biological analyses comprising blood count,  
166 high-sensitive CRP (hsCRP), lipid profile, HbA1c were performed in the laboratory of the  
167 university hospital of Bordeaux on fresh samples.

168 For MI(-) subjects, data available at inclusion included hsCRP level, lipid profile and  
169 traditional CVRF. No blood count was available but none of the subjects developed cancer  
170 (including hematological malignancy) during follow-up suggesting that detectable somatic  
171 mutations were indicative of CHIP and not hematological malignancy.

172

### 173 **Measurement of atherosclerosis burden**

174 For MI(+) subjects, a transthoracic echocardiography was performed at inclusion by trained  
175 cardiologists and ejection fraction calculated. Supra-aortic trunks ultrasonography with 3D-  
176 measurement of atherosclerotic volume was performed by trained physicians, using a  
177 Philips iU22 probe equipped with a linear-3D volume convertor VL13-5 (Philips). Images  
178 were analyzed using the Vascular Plaque Quantification software on the QLAB 10.2 system  
179 (Philips). Carotid stenosis quantification was done with NASCET criteria. Functional ischemic  
180 testing was performed at the clinicians' discretion. For MI(-) subjects, atherosclerosis burden  
181 was assessed at the inclusion by ultrasound echography recording detection of  
182 atherosclerotic plaques, atherosclerotic plaque numbers and intima-media thickness.

183

### 184 **Follow up of subjects**

185 For MI(+) subjects, the follow-up was conducted with a standardized questionnaire  
186 previously validated in clinical trials.<sup>18</sup> Recurrence of MI as well as any significant  
187 cardiovascular event (cardiovascular death, acute coronary syndrome, stroke or transient

188 ischemic attack, congestive heart failure, secondary coronary revascularization, or peripheral  
189 vascular surgery) occurring between the initial event and the year after inclusion in the study  
190 were recorded. All medical records of participants who died, or who reported on the  
191 questionnaire that they had experienced cardiovascular symptoms between baseline and  
192 follow-up evaluations, were reviewed by one of the investigators, and the patient practitioners  
193 were contacted. For MI(-) subjects, a follow up was performed for up to 12 years. All  
194 cardiovascular events were recorded (including MI) with adjudication upon medical records  
195 by an expert committee (Figure 1).

196

### 197 **Search for somatic mutations and mosaic loss of chromosome Y**

198 For both MI(+) and MI(-) subjects, DNA was extracted from total leukocytes obtained at  
199 inclusion. The search for somatic mutations was carried out by the Laboratory of Hematology  
200 of the University Hospital of Bordeaux using the Next Generation Sequencing (NGS) panel  
201 designed for the diagnosis and follow-up of myeloid hematological malignancies. The genes  
202 tested are detailed in Supplementary Table S1.

203

204 Briefly, target sequences were captured using the SureSelect technology (Agilent).  
205 Sequencing was performed on a NextSeq 550Dx Instrument (Illumina technology) and  
206 analyzed using an in-house bioinformatics pipeline (see Supplementary Methods for more  
207 details). Variants interpretation was performed independently by two biologists according to  
208 criteria previously described<sup>19</sup> and reported in Supplementary Table S2. According to the  
209 definition of CHIP, only mutations with a VAF  $\geq$  2% were retained.

210

211 The search of mLOY was performed thanks to an in-house droplet digital PCR technic using  
212 the following primers and probes:

- 213 - Primer-amel-Fwd : 5'- CCCCTGGGCACTGTAAAGAAT
- 214 - Primer-amel-Rev: 5'- CCAAGCATCAGAGCTTAAACTG
- 215 - Probe-amelX : 5'- HEX-CCAAATAAAGTGGTTTCTCAAGT-BHQ

216 - Probe-ameLY: 5'- FAM-CTTGAGAAACATCTGGGATAAAG-BHQ.

217 Briefly, 75 ng of DNA was mixed with ddPCR supermix for Probes (no dUTP, Biorad),  
218 primers (0.9µM each) and probes (0.25µM each). The emulsion was prepared with the QX-  
219 100 (Biorad). The amplification program was as follows: 10-minutes denaturation at 95°C,  
220 followed by 40 cycles of 30 seconds at 94°C, 1 minute at 55°C, and inactivation of 10  
221 minutes at 98°C. The number of droplets positive for amelX and amelY was determined on  
222 the QX-200 droplet reader (Biorad) using the QuantaSoft software version 1.5 (Biorad). At  
223 least 10,000 droplets were analyzed in each well. A cut off of 9% of cells with mLOY defined  
224 the detection of a mLOY based on the study of 30 men of less than 40 years who had a  
225 normal karyotype as assessed by conventional cytogenetic study.

226

## 227 **Statistical analyses**

228 Univariate association analyses were conducted using Fisher exact or Chi-square test  
229 statistics for categorical variables. Analysis of variance was used for quantitative variables.  
230 Multivariate association analyses were performed using logistic or linear regression models  
231 as appropriate. Analyses were adjusted for age and sex (CHIP) or for age only (mLOY). We  
232 used raw values for all quantitative variables as they presented a normal distribution, except  
233 for CRP levels for which we analyzed log(CRP). Log-rank test statistics were employed to  
234 assess the association of clinical/biological variables with the incidence of future  
235 cardiovascular events.

236 All analyses were conducted using either the RStudio software (Posit team (2023). RStudio:  
237 Integrated Development Environment for R. Posit Software, PBC, Boston, MA. URL  
238 <http://www.posit.co/>.) or the PRISM software (GraphPad Prism version 9.5.1).

239

## 240 **Results**

### 241 **Patient's characteristics**

242 In this study, we aimed to decipher whether mLOY could alter the effect of CHIP in  
243 inducing a chronic inflammation that would favor the development of atherosclerosis and the  
244 incidence of atherothrombotic events. To answer this question, we analyzed 446 subjects  
245 from 2 prospective studies, 149 who presented a MI at inclusion and 297 who did not present  
246 any CVE before inclusion. The general characteristics of the 446 combined subjects are  
247 detailed in Table 1. Briefly, the median age was 76.4 years and 257 (57.6%) were males.  
248 Forty percent of them presented more than 2 CVRF. MI(+) subjects were older (due to the  
249 inclusion criteria), more frequently men, and presented a lower cardiovascular risk than MI(-)  
250 subjects (due to the initiation of treatment between the initial event and the inclusion).

251

### 252 **CHIP and mLOY are detected as frequently in MI(+) and MI(-) subjects**

253 Among the 446 subjects, at least one mutation with a VAF $\geq$ 2% was detected in 201  
254 persons (45.1%), defining CHIP(+) subjects (Table 1, Figure 1A). As previously described,  
255 *DNMT3A* and *TET2* were the 2 most frequently mutated genes. The other mutated genes  
256 were those previously described in CHIP (Figure 1B)<sup>2,4,16</sup> and the median VAF was 2%  
257 (Figure 1C). The mutational profile of CHIP(+) subjects is available in the Supplementary  
258 Tables S3 and S4 while the characteristics of CHIP(+) compared with CHIP(-) subjects are  
259 detailed in the Supplementary Tables S5 and S6. In this study, we considered subjects  
260 without any detectable mutation or with only mutations with a VAF below 2% as non-CHIP  
261 carriers (CHIP(-) subjects).

262 A mLOY was present in 83 (37.7%) male subjects (mLOY(+) subjects, Table 1,  
263 Figure 1A). The clinico-biological characteristics of mLOY(+) subjects compared with mLOY(-  
264 ) subjects are detailed in the Supplementary Tables S5 and S6. The median proportion of  
265 cells with mLOY was 18% [12%;32%]. There was no significant association between CHIP  
266 and mLOY since 39 CHIP(+) subjects (39.8%) also carried a mLOY compared with 44  
267 CHIP(-) subjects (36.1%, p=0.579). Finally, as previously demonstrated, CHIP(+) subjects

268 were significantly older than CHIP(-) subjects (Supplementary Tables S5 and S6). We also  
269 observed an increasing prevalence of both CHIP and mLOY with age (Figure 1D).

270 We observed a similar frequency of CHIP and mLOY in MI(+) and MI(-) subjects  
271 (Figure 1A, Table 1). Besides, the association of CHIP with mLOY was as frequent in MI(+)  
272 and MI(-) subjects (22.7% and 13.8%,  $p=0.797$ ). Of note, MI(+) and MI(-) subjects presented  
273 similar proportions of mutated genes (Figure 1B) and VAF (Supplementary Figure 2). Similar  
274 results were also observed when considering CHIP associated with important clones (*i.e.*  
275  $VAF \geq 5\%$ , Table 1). or when analyzing only *DNMT3A* and *TET2* mutations (data not shown).

276 Altogether, these results suggest that CHIP and mLOY are very frequent but not  
277 associated with the existence of a history of MI, even when mLOY is associated with CHIP.

278

279 **Neither CHIP, mLOY, nor their combination highly increase basal inflammation or**  
280 **atherosclerotic burden**

281 It was demonstrated that *TET2* mutations were associated with the induction of a pro-  
282 inflammatory phenotype of macrophages.<sup>5</sup> On the contrary, mLOY was shown to decrease  
283 the inflammatory phenotype of macrophages.<sup>14</sup> Therefore, we searched to determine  
284 whether mLOY could counter the inflammatory state that would be associated with CHIP. In  
285 the total cohort, CHIP(+) and CHIP(-) subjects presented similar levels of hsCRP, as did  
286 mLOY(+) and mLOY(-) subjects (Table 2). Similarly, hsCRP levels were not different in  
287 CHIP(-)/mLOY(-), CHIP(+)/mLOY(-), CHIP(-)/mLOY(+) and CHIP(+)/mLOY(+) subjects. The  
288 impact of CHIP and mLOY on hsCRP levels, either alone or in combination, was comparable  
289 in MI(+) or MI(-) subjects (Table 2).—This was also true when restricting the analysis to  
290 *DNMT3A* and *TET2* mutated CHIP(+) subjects (Supplementary Table S7). Finally, subjects  
291 with important CHIP or mLOY clones did not present higher levels of hsCRP (Supplementary  
292 Table S8).

293 Very few data are available about atheroma burden associated with CHIP and/or  
294 mLOY in humans. Moreover, the modulation of the atherogenic effect of CHIP by mLOY  
295 remains unexplored. We thus asked whether CHIP alone or in association with mLOY was

296 associated with an increased atherosclerotic burden. In MI(+) subjects we observed a similar  
297 proportion of multitruncular coronary lesions and carotid stenosis >50% in CHIP(+) and  
298 CHIP(-) subjects (Table 3). The global atheroma volume was explored by 3D ultrasound in  
299 34 MI(+) patients, without difference between CHIP(+) and CHIP(-) subjects. Similar results  
300 were obtained when analyzing only CHIP(+) subjects carrying *TET2* and/or *DNMT3A*  
301 mutations (Supplementary Table S7), when comparing mLOY(+) and mLOY(-) subjects  
302 (Table 3), or when analyzing the association of CHIP with mLOY (Supplementary Table S9).  
303 Concordantly, in MI(-) subjects, all available atherosclerosis markers were similar between  
304 CHIP(+) and CHIP(-), as well as between mLOY(+) and mLOY(-) subjects (Table 3). This  
305 was also true when analyzing the effect of the different combinations of CHIP and mLOY  
306 (Supplementary Table S9). Once again, all these results were confirmed in subjects with a  
307 VAF  $\geq 5\%$  for CHIP or a mLOY  $\geq 50\%$  (Supplementary Table S8).

308 Altogether, our results suggest that both in the context of a recent MI and in healthy  
309 individuals, CHIP were not associated with a systemic inflammation or an increased  
310 atherosclerotic burden. mLOY do not modulate inflammatory parameters or atherosclerosis,  
311 even in the presence of CHIP.

312

### 313 **Neither CHIP, mLOY, nor their combination highly impact the incidence of MI.**

314 To decipher whether mLOY could impact the atherothrombotic risk associated with  
315 CHIP, we analyzed the incidence of MI during the follow-up of MI(-) subjects. Seventy-nine  
316 subjects developed a MI after inclusion in the study with a median delay of 5.00 years.  
317 Subjects with MI during follow-up did not differ significantly from those without MI in terms of  
318 demography or cardiovascular risk (Supplementary Table S10). CHIP, mLOY and their  
319 association were not significantly associated with an increased incidence of MI (Figure 2A-B,  
320 Supplementary Table S11). Concordantly, we did not observe any difference in the  
321 prevalence of CHIP, mLOY or their association between MI(-) subjects who suffered from a  
322 MI during follow up and those who did not (Supplementary Table S10). This was also the  
323 case when restricting the analysis to CHIP with a VAF  $\geq 5\%$ , a proportion of cells with mLOY

324  $\geq 50\%$  or to CHIP associated with *DNMT3A* or *TET2* mutations (Supplementary Figure S3A-  
325 S3B, Supplementary Table S10). These results suggest that the atherothrombotic risk  
326 associated with CHIP is moderate, and is not modulated by its association with mLOY.  
327 Moreover, neither CHIP, mLOY nor their combination were significantly associated with  
328 atherothrombotic recurrence (Supplementary Table S11).

329

### 330 **CHIP in the absence of mLOY may accelerate the occurrence of MI**

331 In order to search for a combined effect of CHIP with mLOY on the risk of incidence  
332 of MI, we finally focused our analysis on MI(-) male subjects. In this population, we observed  
333 that MI occurred earlier in CHIP(+) subjects, with a significant increased 5-year incidence of  
334 MI (log-rank test,  $p=0.0142$ , Figure 2C). Such an effect was not observed in MI(-) female  
335 subjects (log-rank test,  $p=0.9402$ , Supplementary Figure S3C). Interestingly, this effect was  
336 more pronounced in CHIP(+)/mLOY(-) subjects who presented a significantly higher 5-year  
337 incidence of MI (log-rank test,  $p=0.0104$ , Figure 2D) and a significantly lower median time to  
338 MI compared with other subjects (Kruskall-Wallis test,  $p=0.007$ ). Altogether, our results  
339 suggest that CHIP do not increase the risk of MI, but may accelerate its incidence,  
340 particularly in the absence of mLOY.

341

## 342 **Discussion**

343 Clonal hematopoiesis of indeterminate potential (CHIP) has previously been implicated in  
344 decreased overall survival, primarily due to its association with an increased incidence of  
345 cardiovascular diseases such as coronary artery disease (CAD) and stroke.<sup>2,4</sup> Experimental  
346 models have suggested that this association may arise from the pro-inflammatory phenotype  
347 of mutated monocytes/macrophages, contributing to the development of atherosclerotic  
348 plaques.<sup>4,5</sup> However, recent findings in the literature have presented a complex and  
349 sometimes contradictory picture. Studies have reported varying results regarding the  
350 relationship between CHIP, inflammation markers, and atherothrombotic events, challenging  
351 the initial notion of a high atherothrombotic risk associated with CHIP.<sup>6,7,9,20,21</sup> Moreover,  
352 there has been a scarcity of evidence linking CHIP to an increased burden of atherosclerosis  
353 in human subjects.<sup>4,22</sup> Additionally, limited data are available on the potential impact of  
354 chromosomal abnormalities, particularly mosaic loss of the Y chromosome (mLOY), on  
355 atherothrombosis in individuals with CHIP. In this study, we sought to investigate whether  
356 mLOY could modulate the effects of CHIP concerning systemic inflammation, atherosclerotic  
357 burden, and the risk of atherothrombotic events. To achieve this, we employed sensitive  
358 techniques, including targeted high-throughput sequencing and digital PCR, to analyze  
359 samples from two cohorts of meticulously phenotyped subjects.

360 In contrast to many previous studies, we conducted a comprehensive analysis involving two  
361 distinct cohorts. The "cases" were individuals recruited from the CHAth study within 2 to 7  
362 months following their first myocardial infarction (MI) after the age of 75. We also established  
363 a "control cohort" comprising 297 subjects from the 3-city cohort, none of whom had  
364 experienced CVE before inclusion. This allowed us to assess the effects of CHIP and mLOY  
365 on inflammation and atherosclerosis independently of pre-existing cardiovascular disease.

366 Our analysis revealed a remarkably high frequency of CHIP, with an estimated prevalence of  
367 45% among our 446 subjects, with a median age of 76.4 years. This prevalence exceeded



368 initial reports of 15-20% determined by whole exome sequencing (WES) in individuals aged  
369 70-80,<sup>2,23</sup> likely attributable to the enhanced sensitivity of our sequencing technique.  
370 Importantly, our estimated prevalence aligns with studies employing similarly sensitive high-  
371 throughput sequencing techniques.<sup>24-27</sup> Furthermore, our approach allowed us to reliably  
372 detect mutations with a variant allele frequency (VAF) as low as 1%. We chose to define  
373 subjects with detectable mutations at a VAF of 1% as CHIP(-), aligning with the WHO  
374 definition of CHIP.<sup>28</sup> Notably, all our analyses also yielded identical results when comparing  
375 CHIP(+) patients to subjects without detectable mutations.

376 A recent study by Mas-Peiro et al. demonstrated an association between mLOY and  
377 increased post-transcatheter aortic valve replacement (TAVR) mortality.<sup>29</sup> In their  
378 investigation, a mLOY ratio threshold of 17% was deemed the most relevant for  
379 discriminating patients' mortality risk. In our study, we employed a mLOY threshold of 9% to  
380 identify mLOY, a value determined through DNA samples from patients for whom the  
381 absence of mLOY had been definitively established through conventional cytogenetic  
382 analysis and an age below 40 years. Using this threshold, we frequently detected mLOY in  
383 male subjects within our cohort, with an estimated prevalence of 37.7% among 220 subjects.  
384 This prevalence surpasses that reported by Forsberg et al.<sup>30</sup> but aligns with recent findings  
385 from studies employing sensitive techniques.<sup>16</sup>

386 Surprisingly, our cohort did not reveal any significant association between the presence of  
387 CHIP and the detection of mLOY. This contrasts with the results of two recent studies,<sup>15,16</sup>  
388 possibly explained by the heightened sensitivity of our methodology in reliably detecting both  
389 somatic mutations and mLOY, which may exist in very small proportions of blood cells.

390 Mouse models of CHIP have recently suggested that somatic mutations are linked to a pro-  
391 inflammatory phenotype of mutated monocytes/macrophages, an observation supported by  
392 human samples using single-cell RNA sequencing.<sup>31</sup> However, contradictory results have  
393 emerged when examining plasmatic markers of inflammation. Studies, including ours, have

394 not consistently identified a significant increase in plasma hsCRP or proinflammatory  
395 cytokines in CHIP carriers,<sup>25,32</sup> whereas others have reported such associations.<sup>20,21</sup>  
396 Importantly, our study did not observe any significant association between the detection of  
397 CHIP(+/-)mLOY and plasma levels of IL1 $\beta$  and IL6 in MI(+) subjects, suggesting that CHIP's  
398 association with increased systemic inflammation may depend on specific stimulating factors.  
399 Notably, recent studies have reported elevated levels of plasma inflammatory markers in  
400 CHIP carriers during atherothrombotic events, such as MI or stroke,<sup>33-35</sup> indicating that CHIP  
401 may amplify systemic inflammation under specific conditions, but not necessarily in a basal  
402 state, as in our study.

403 To date, only a limited number of studies have successfully linked the presence of CHIP to  
404 an increased atherosclerotic burden. While Jaiswal *et al.* reported a higher calcic score in  
405 subjects with CHIP<sup>4</sup>, and Zekavat *et al.* suggested an increased atherosclerosis,<sup>22</sup> these  
406 evaluations relied on self-reported atheroma and indirect parameters. Our study stands as  
407 the first to utilize direct markers of atherosclerosis, including global atheroma volume, in  
408 CHIP(+) subjects within the context of coronary artery disease. Strikingly, we did not detect a  
409 clear increase in atherosclerosis among CHIP or mLOY carriers, either individually or in  
410 combination. Conversely, increased atherosclerotic burden associated with CHIP has been  
411 observed in patients with stroke.<sup>36</sup>

412 Our cohort comprising 449 subjects was unable to establish a direct association between  
413 CHIP, either alone or in conjunction with mLOY, and coronary heart disease. These results  
414 align with previous studies that reported either no difference in CHIP prevalence between  
415 individuals with MI and those without,<sup>21</sup> or no significant association between CHIP and  
416 incident de novo or recurrent atherothrombotic events.<sup>7,34,37</sup> Recently, Kessler *et al.* proposed  
417 that the increased risk of atherothrombotic events might be limited to CHIP with a VAF of  
418 10% or higher.<sup>6</sup> However, even when considering this criterion, the association was not  
419 validated in a cohort of 173,585 subjects. Notably, at the time of our study's initiation, the

420 literature suggested an increased MI risk associated with CHIP, with a hazard ratio of 1.9-  
421 2.0. Based on this data, a cohort of 112 cases would have been sufficient to demonstrate a  
422 more frequent detection of CHIP in MI(+) patients compared to MI(-) subjects with a power of  
423 0.90. This underscores the formidable challenges of identifying associations with low effect  
424 sizes, necessitating cohorts comprising hundreds of thousands of subjects to achieve  
425 statistical significance. Regarding specific mutations in *DNMT3A*, *TET2* or other genes, our  
426 study did not reveal differing effects on inflammation, atherosclerosis, or MI incidence.  
427 Collectively, these findings suggest that any atherothrombotic risk associated with CHIP is  
428 limited in scope.

429 In conclusion, our study does not provide substantive evidence supporting a significant  
430 association between CHIP and substantial systemic inflammation, a pronounced increase in  
431 atherosclerotic burden, or a markedly elevated atherothrombotic risk. Additionally, mLOY did  
432 not appear to significantly modulate inflammation or atherosclerosis in the presence of CHIP.  
433 However, our data suggests that CHIP might expedite the onset of MI, particularly in the  
434 absence of mLOY. These findings warrant further investigation in larger subject cohorts.

435 While our study bears some limitations, including a relatively modest sample size of 449  
436 subjects and recruitment of subjects within 2 to 7 months post-MI, it possesses strengths.  
437 Notably, we employed highly sensitive techniques for the reliable detection of both CHIP and  
438 mLOY, surpassing the capabilities of large cohort studies relying on whole exome  
439 sequencing and SNP arrays. Furthermore, we meticulously assessed atherosclerotic burden  
440 using sensitive parameters and conducted a thorough evaluation of two cohorts—one  
441 comprising MI(+) subjects and the other MI(-) subjects—with precise cardiovascular  
442 phenotyping at inclusion and rigorous follow-up, including direct evaluation and adjudication  
443 of all CVE.

444 In summary, our findings provide a nuanced perspective on the relationship between CHIP,  
445 mLOY, and cardiovascular outcomes, highlighting the need for larger, more comprehensive  
446 studies to elucidate potential associations further.

447

448 **Acknowledgements**

449 The authors would like to thank the CRB-K of the University Hospital of Bordeaux for  
450 processing of the samples and Coralie Foucault and the Agilent Society for their partnership  
451 in supplying NGS reactive. We also thank Marina Migeon, Joël Decombe and Candice  
452 Falourd for their technical help, as well as Christel Duprat and Matthieu Meilhan for  
453 operational organization of the project.

454

455 **Authorship**

456 TC, OM and CJ designed the study. SF, YP, TC, AG and JB enrolled the subjects in the  
457 CHAth study and performed all cardiovascular evaluation. AS, CT and SD set up the 3 City  
458 Study Cohort. AB, SM, OM analyzed the NGS data. MD and DAT realized the statistical  
459 analysis. SF, SM, MD, DAT, CJ, OM and TC wrote the paper. All authors read and agreed to  
460 the final version of the manuscript.

461

462 **References**

- 463 1. Berry JD, Ning H, Horn LV, Lloyd-Jones DM. Lifetime Risks of Cardiovascular  
464 Disease. *N Engl J Med* 2012;9.
- 465 2. Jaiswal S, Fontanillas P, Flannick J, Manning A, Grauman PV, Mar BG, Lindsley RC,  
466 Mermel CH, Burt N, Chavez A, Higgins JM, Moltchanov V, Kuo FC, Kluk MJ, Henderson B,  
467 Kinnunen L, Koistinen HA, Ladenvall C, Getz G, Correa A, Banahan BF, Gabriel S,  
468 Kathiresan S, Stringham HM, McCarthy MI, Boehnke M, Tuomilehto J, Haiman C, Groop L,  
469 Atzmon G, Wilson JG, Neuberg D, Altshuler D, Ebert BL. Age-Related Clonal Hematopoiesis  
470 Associated with Adverse Outcomes. *N Engl J Med* 2014;**371**:2488–2498.
- 471 3. Steensma DP, Bejar R, Jaiswal S, Lindsley RC, Sekeres MA, Hasserjian RP, Ebert  
472 BL. Clonal hematopoiesis of indeterminate potential and its distinction from myelodysplastic  
473 syndromes. *Blood* 2015;**126**:9–16.
- 474 4. Jaiswal S, Natarajan P, Silver AJ, Gibson CJ, Bick AG, Shvartz E, McConkey M,  
475 Gupta N, Gabriel S, Ardissino D, Baber U, Mehran R, Fuster V, Danesh J, Frossard P,  
476 Saleheen D, Melander O, Sukhova GK, Neuberg D, Libby P, Kathiresan S, Ebert BL. Clonal  
477 Hematopoiesis and Risk of Atherosclerotic Cardiovascular Disease. *N Engl J Med*  
478 2017;**377**:111–121.
- 479 5. Fuster JJ, MacLauchlan S, Zuriaga MA, Polackal MN, Ostriker AC, Chakraborty R,  
480 Wu C-L, Sano S, Muralidharan S, Rius C, Vuong J, Jacob S, Muralidhar V, Robertson AAB,  
481 Cooper MA, Andrés V, Hirschi KK, Martin KA, Walsh K. Clonal hematopoiesis associated  
482 with TET2 deficiency accelerates atherosclerosis development in mice. *Science*  
483 2017;**355**:842–847.
- 484 6. Kessler MD, Damask A, O’Keeffe S, Van Meter M, Banerjee N, Semrau S, Li D,  
485 Watanabe K, Horowitz J, Houvras Y, Gillies C, Mbatchou J, White RR, Kosmicki JA, LeBlanc  
486 MG, Jones M, Regeneron Genetics Center, GHS-RGC DiscovEHR Collaboration, Glass DJ,  
487 Lotta LA, Cantor MN, Atwal GS, Locke AE, Ferreira MAR, Deering R, Paulding C, Shuldiner  
488 AR, Thurston G, Salerno W, Reid JG, Overton JD, Marchini J, Kang HM, Baras A, Abecasis  
489 GR, Jorgenson E. Exome sequencing of 628,388 individuals identifies common and rare

490 variant associations with clonal hematopoiesis phenotypes

491 7. Kar SP, Quiros PM, Gu M, Jiang T, Langdon R, Iyer V, Barcena C, Vijayabaskar MS,  
492 Fabre MA, Carter P, Burgess S, Vassiliou GS. Genome-wide analyses of 200,453 individuals  
493 yields new insights into the causes and consequences of clonal hematopoiesis

494 8. Bick AG, Pirruccello JP, Griffin GK, Gupta N, Gabriel S, Saleheen D, Libby P,  
495 Kathiresan S, Natarajan P. Genetic Interleukin 6 Signaling Deficiency Attenuates  
496 Cardiovascular Risk in Clonal Hematopoiesis. *Circulation* 2020;**141**:124–131.

497 9. Vlasschaert C, Heimlich JB, Rauh MJ, Natarajan P, Bick AG. Interleukin-6 Receptor  
498 Polymorphism Attenuates Clonal Hematopoiesis-Mediated Coronary Artery Disease Risk  
499 Among 451 180 Individuals in the UK Biobank. *Circulation* 2023;**147**:358–360.

500 10. Saiki R, Momozawa Y, Nannya Y, Nakagawa MM, Ochi Y, Yoshizato T, Terao C,  
501 Kuroda Y, Shiraishi Y, Chiba K, Tanaka H, Niida A, Imoto S, Matsuda K, Morisaki T,  
502 Murakami Y, Kamatani Y, Matsuda S, Kubo M, Miyano S, Makishima H, Ogawa S.  
503 Combined landscape of single-nucleotide variants and copy number alterations in clonal  
504 hematopoiesis. *Nat Med* 2021;**27**:1239–1249.

505 11. Wright DJ, Day FR, Kerrison ND, Zink F, Cardona A, Sulem P, Thompson DJ,  
506 Sigurjonsdottir S, Gudbjartsson DF, Helgason A, Chapman JR, Jackson SP, Langenberg C,  
507 Wareham NJ, Scott RA, Thorsteindottir U, Ong KK, Stefansson K, Perry JRB. Genetic  
508 variants associated with mosaic Y chromosome loss highlight cell cycle genes and overlap  
509 with cancer susceptibility. *Nat Genet* 2017;**49**:674–679.

510 12. Zhou W, Machiela MJ, Freedman ND, Rothman N, Malats N, Dagnall C, Caporaso N,  
511 Teras LT, Gaudet MM, Gapstur SM, Stevens VL, Jacobs KB, Sampson J, Albanes D,  
512 Weinstein S, Virtamo J, Berndt S, Hoover RN, Black A, Silverman D, Figueroa J, Garcia-  
513 Closas M, Real FX, Earl J, Marenne G, Rodriguez-Santiago B, Karagas M, Johnson A,  
514 Schwenn M, Wu X, Gu J, Ye Y, Hutchinson A, Tucker M, Perez-Jurado LA, Dean M, Yeager  
515 M, Chanock SJ. Mosaic loss of chromosome Y is associated with common variation near  
516 *TCL1A*. *Nat Genet* 2016;**48**:563–568.

517 13. Lofffield E, Zhou W, Graubard BI, Yeager M, Chanock SJ, Freedman ND, Machiela

- 518 MJ. Predictors of mosaic chromosome Y loss and associations with mortality in the UK  
519 Biobank. *Sci Rep* 2018;**8**:12316.
- 520 14. Sano S, Horitani K, Ogawa H, Halvardson J, Chavkin NW, Wang Y, Sano M,  
521 Mattisson J, Hata A, Danielsson M, Miura-Yura E, Zaghlool A, Evans MA, Fall T, De Hoyos  
522 HN, Sundström J, Yura Y, Kour A, Arai Y, Thel MC, Arai Y, Mychaleckyj JC, Hirschi KK,  
523 Forsberg LA, Walsh K. Hematopoietic loss of Y chromosome leads to cardiac fibrosis and  
524 heart failure mortality. *Science* 2022;**377**:292–297.
- 525 15. Ljungström V, Mattisson J, Halvardson J, Pandzic T, Davies H, Rychlicka-Buniowska  
526 E, Danielsson M, Lacaze P, Cavelier L, Dumanski JP, Baliakas P, Forsberg LA. Loss of Y  
527 and clonal hematopoiesis in blood—two sides of the same coin? *Leukemia* 2022;**36**:889–891.
- 528 16. Zink F, Stacey SN, Norrdahl GL, Frigge ML, Magnusson OT, Jonsdottir I,  
529 Thorgeirsson TE, Sigurdsson A, Gudjonsson SA, Gudmundsson J, Jonasson JG,  
530 Tryggvadottir L, Jonsson T, Helgason A, Gylfason A, Sulem P, Rafnar T, Thorsteinsdottir U,  
531 Gudbjartsson DF, Masson G, Kong A, Stefansson K. Clonal hematopoiesis, with and without  
532 candidate driver mutations, is common in the elderly. *Blood* 2017;**130**:742–752.
- 533 17. 3C Study Group. Vascular factors and risk of dementia: design of the Three-City  
534 Study and baseline characteristics of the study population. *Neuroepidemiology* 2003;**22**:316–  
535 325.
- 536 18. Lafitte M, Pucheu Y, Latry K, Dijos M, Casassus E, Couffignal T. Predictors of  
537 cardiovascular prognosis in patients receiving optimized secondary prevention measures  
538 after acute coronary syndrome. *Eur J Prev Cardiol* 2013;**20**:283–290.
- 539 19. Luque Paz D, Riou J, Verger E, Cassinat B, Chauveau A, Ianotto J-C, Dupriez B,  
540 Boyer F, Renard M, Mansier O, Murati A, Rey J, Etienne G, Mansat-De Mas V, Tavitian S,  
541 Nibourel O, Girault S, Le Bris Y, Girodon F, Ranta D, Chomel J-C, Cony-Makhoul P, Sujobert  
542 P, Robles M, Ben Abdelali R, Kosmider O, Cottin L, Roy L, Sloma I, Vacheret F, Wemeau M,  
543 Mossuz P, Slama B, Cussac V, Denis G, Walter-Petrich A, Burrioni B, Jézéquel N, Giraudier  
544 S, Lippert E, Socié G, Kiladjian J-J, Ugo V. Genomic analysis of primary and secondary  
545 myelofibrosis redefines the prognostic impact of ASXL1 mutations: a FIM study. *Blood Adv*



- 546 2021;**5**:1442–1451.
- 547 20. Bick AG, Weinstock JS, Nandakumar SK, Fulco CP, Leventhal MJ, Bao EL, Nasser J,  
548 Zekavat SM, Szeto MD, Laurie C, Taub MA, Mitchell BD, Barnes KC, Moscati A, Fornage M,  
549 Redline S, Psaty BM, Silverman EK, Weiss ST, Palmer ND, Vasani RS, Burchard EG, Kardia  
550 SL, He J, Kaplan RC, Smith NL, Arnett DK, Schwartz DA, Correa A, Andrade M de, Guo X,  
551 Konkole BA, Custer B, Peralta JM, Gui H, Meyers DA, McGarvey ST, Chen IY-D, Shoemaker  
552 MB, Peyser PA, Broome JG, Gogarten SM, Wang FF, Wong Q, Montasser ME, Daya M,  
553 Kenny EE, North K, Launer LJ, Cade BE, Bis JC, Cho MH, Lasky-Su J, Bowden DW,  
554 Cupples LA, Mak AC, Becker LC, Smith JA, Kelly TN, Aslibekyan S, Heckbert SR, Tiwari HK,  
555 Yang IV, Heit JA, Lubitz SA, Rich SS, Johnsen JM, Curran JE, Wenzel S, Weeks DE, Rao  
556 DC, Darbar D, Moon J-Y, Tracy RP, Buth EJ, Rafaels N, Loos RJ, Hou L, Lee J, Kachroo P,  
557 Freedman BI, Levy D, Bielak LF, Hixson JE, Floyd JS, Whitsel EA, Ellinor P, Irvin MR,  
558 Fingerlin TE, Raffield LM, Armasu SM, Rotter JI, Wheeler MM, Sabino EC, Blangero J,  
559 Williams LK, Levy BD, Sheu WH-H, Roden DM, Boerwinkle E, Manson JE, Mathias RA,  
560 Desai P, Taylor KD, Johnson A, Auer PL, Kooperberg C, Laurie CC, Blackwell TW, Smith  
561 AV, Zhao H, Lange E, Lange L, Wilson JG, Lander ES, Engreitz JM, Ebert BL, Reiner AP,  
562 Sankaran VG, Jaiswal S, Abecasis G, Natarajan P, Kathiresan S, on behalf of the NHLBI  
563 Trans-Omics for Precision Medicine (TOPMed) Consortium. Inherited Causes of Clonal  
564 Hematopoiesis of Indeterminate Potential in TOPMed Whole Genomes
- 565 21. Busque L, Sun M, Buscarlet M, Ayachi S, Feroz Zada Y, Provost S, Bourgoin V,  
566 Mollica L, Meisel M, Hinterleitner R, Jabri B, Dubé M-P, Tardif J-C. High-sensitivity C-  
567 reactive protein is associated with clonal hematopoiesis of indeterminate potential. *Blood Adv*  
568 2020;**4**:2430–2438.
- 569 22. Zekavat SM, Viana-Huete V, Matesanz N, Jorshery SD, Zuriaga MA, Uddin MM,  
570 Trinder M, Paruchuri K, Zorita V, Ferrer-Pérez A, Amorós-Pérez M, Kunderfranco P, Carriero  
571 R, Greco CM, Aroca-Crevillen A, Hidalgo A, Damrauer SM, Ballantyne CM, Niroula A,  
572 Gibson CJ, Pirruccello J, Griffin G, Ebert BL, Libby P, Fuster V, Zhao H, Ghassemi M,  
573 Natarajan P, Bick AG, Fuster JJ, Klarin D. TP53-mediated clonal hematopoiesis confers

- 574 increased risk for incident atherosclerotic disease. *Nat Cardiovasc Res* 2023;1–15.
- 575 23. Genovese G, Kähler AK, Handsaker RE, Lindberg J, Rose SA, Bakhoun SF,  
576 Chambert K, Mick E, Neale BM, Fromer M, Purcell SM, Svantesson O, Landén M, Höglund  
577 M, Lehmann S, Gabriel SB, Moran JL, Lander ES, Sullivan PF, Sklar P, Grönberg H,  
578 Hultman CM, McCarroll SA. Clonal Hematopoiesis and Blood-Cancer Risk Inferred from  
579 Blood DNA Sequence. *N Engl J Med* 2014;**371**:2477–2487.
- 580 24. Guermouche H, Ravalet N, Gallay N, Deswarte C, Foucault A, Beaud J, Rault E,  
581 Saindoy E, Lachot S, Martignoles J-A, Gissot V, Suner L, Gyan E, Delhommeau F, Herault  
582 O, Hirsch P. High prevalence of clonal hematopoiesis in the blood and bone marrow of  
583 healthy volunteers. *Blood Adv* 2020;**4**:3550–3557.
- 584 25. Pascual-Figal DA, Bayes-Genis A, Díez-Díez M, Hernández-Vicente Á, Vázquez-  
585 Andrés D, Barrera J de la, Vazquez E, Quintas A, Zuriaga MA, Asensio-López MC, Dopazo  
586 A, Sánchez-Cabo F, Fuster JJ. Clonal Hematopoiesis and Risk of Progression of  
587 Heart Failure With Reduced Left Ventricular Ejection Fraction. *J Am Coll Cardiol*  
588 2021;**77**:1747–1759.
- 589 26. Mas-Peiro S, Hoffmann J, Fichtlscherer S, Dorsheimer L, Rieger MA, Dimmeler S,  
590 Vasa-Nicotera M, Zeiher AM. Clonal haematopoiesis in patients with degenerative aortic  
591 valve stenosis undergoing transcatheter aortic valve implantation. *Eur Heart J* 2020;**41**:933–  
592 939.
- 593 27. Zeventer IA van, Salzbrunn JB, Graaf AO de, Reijden BA van der, Boezen HM, Vonk  
594 JM, Harst P van der, Schuringa JJ, Jansen JH, Huls G. Prevalence, predictors, and  
595 outcomes of clonal hematopoiesis in individuals aged  $\geq 80$  years. *Blood Adv* 2021;**5**:2115–  
596 2122.
- 597 28. Khoury JD, Solary E, Abala O, Akkari Y, Alaggio R, Apperley JF, Bejar R, Berti E,  
598 Busque L, Chan JKC, Chen W, Chen X, Chng W-J, Choi JK, Colmenero I, Coupland SE,  
599 Cross NCP, De Jong D, Elghetany MT, Takahashi E, Emile J-F, Ferry J, Fogelstrand L,  
600 Fontenay M, Germing U, Gujral S, Haferlach T, Harrison C, Hodge JC, Hu S, Jansen JH,  
601 Kanagal-Shamanna R, Kantarjian HM, Kratz CP, Li X-Q, Lim MS, Loeb K, Loghavi S,

- 602 Marcogliese A, Meshinchi S, Michaels P, Naresh KN, Natkunam Y, Nejati R, Ott G, Padron  
603 E, Patel KP, Patkar N, Picarsic J, Platzbecker U, Roberts I, Schuh A, Sewell W, Siebert R,  
604 Tembhare P, Tyner J, Verstovsek S, Wang W, Wood B, Xiao W, Yeung C, Hochhaus A. The  
605 5th edition of the World Health Organization Classification of Haematolymphoid Tumours:  
606 Myeloid and Histiocytic/Dendritic Neoplasms. *Leukemia* 2022;**36**:1703–1719.
- 607 29. Mas-Peiro S, Abplanalp WT, Rasper T, Berkowitsch A, Leistner DM, Dimmeler S,  
608 Zeiher AM. Mosaic loss of Y chromosome in monocytes is associated with lower survival  
609 after transcatheter aortic valve replacement. *Eur Heart J* 2023;**44**:1943–1952.
- 610 30. Forsberg LA, Rasi C, Malmqvist N, Davies H, Pasupulati S, Pakalapati G, Sandgren  
611 J, Diaz de Ståhl T, Zaghlool A, Giedraitis V, Lannfelt L, Score J, Cross NCP, Absher D,  
612 Janson ET, Lindgren CM, Morris AP, Ingelsson E, Lind L, Dumanski JP. Mosaic loss of  
613 chromosome Y in peripheral blood is associated with shorter survival and higher risk of  
614 cancer. *Nat Genet* 2014;**46**:624–628.
- 615 31. Abplanalp WT, Cremer S, John D, Hoffmann J, Schuhmacher B, Merten M, Rieger  
616 MA, Vasa-Nicotera M, Zeiher AM, Dimmeler S. Clonal Hematopoiesis-Driver DNMT3A  
617 Mutations Alter Immune Cells in Heart Failure. *Circ Res* 2021;**128**:216–228.
- 618 32. Cook EK, Izukawa T, Young S, Rosen G, Jamali M, Zhang L, Johnson D, Bain E,  
619 Hilland J, Ferrone CK, Buckstein J, Francis J, Momtaz B, McNaughton AJM, Liu X,  
620 Snetsinger B, Buckstein R, Rauh MJ. Comorbid and inflammatory characteristics of genetic  
621 subtypes of clonal hematopoiesis. *Blood Adv* 2019;**3**:2482–2486.
- 622 33. Wang S, Hu S, Luo X, Bao X, Li J, Liu M, Lv Y, Zhao C, Zeng M, Chen X, Unsworth  
623 A, Jones S, Johnson TW, White SJ, Jia H, Yu B. Prevalence and prognostic significance of  
624 DNMT3A- and TET2- clonal haematopoiesis-driver mutations in patients presenting with ST-  
625 segment elevation myocardial infarction. *eBioMedicine* 2022;**78**:103964.
- 626 34. Arends CM, Liman TG, Strzelecka PM, Kufner A, Löwe P, Huo S, Stein CM, Piper  
627 SK, Tilgner M, Sperber PS, Dimitriou S, Heuschmann P, Hablesreiter R, Harms C, Bullinger  
628 L, Weber JE, Endres M, Damm F. Associations of clonal haematopoiesis with recurrent  
629 vascular events and death in patients with incident ischemic stroke. *Blood*

630 2022:blood.2022017661.

631 35. Böhme M, Desch S, Rosolowski M, Scholz M, Krohn K, Büttner P, Cross M,  
632 Kirchberg J, Rommel K-P, Pöss J, Freund A, Baber R, Isermann B, Ceglarek U, Metzeler  
633 KH, Platzbecker U, Thiele H. Impact of Clonal Hematopoiesis in Patients With Cardiogenic  
634 Shock Complicating Acute Myocardial Infarction. *J Am Coll Cardiol* 2022;**80**:1545–1556.

635 36. Mayerhofer E, Strecker C, Becker H, Georgakis MK, Uddin MM, Hoffmann MM,  
636 Nadarajah N, Meggendorfer M, Haferlach T, Rosand J, Natarajan P, Anderson CD, Harloff A,  
637 Hoermann G. Prevalence and Therapeutic Implications of Clonal Hematopoiesis of  
638 Indeterminate Potential in Young Patients With Stroke. *Stroke* 2023.

639 37. David C, Duployez N, Eloy P, Belhadi D, Chezeli J, Guern VL, Laouénan C, Fenwarth  
640 L, Rouzaud D, Mathian A, Almeida Chaves S de, Duhaut P, Fain O, Galicier L, Ghillani-  
641 Dalbin P, Kahn JE, Morel N, Perard L, Pha M, Sarrot-Reynauld F, Aumaitre O, Chasset F,  
642 Limal N, Desmurs-Clavel H, Ackermann F, Amoura Z, Papo T, Preudhomme C, Costedoat-  
643 Chalumeau N, Sacre K. Clonal haematopoiesis of indeterminate potential and cardiovascular  
644 events in systemic lupus erythematosus (HEMATOPLUS study). *Rheumatol Oxf Engl*  
645 2022;**61**:4355–4363.

646

647 **Figure legends**

648

649 **Figure 1: CHIP, mLOY and their combination are as frequent in MI(+) and MI(-) subjects**

650 A: Prevalence of CHIP, mLOY and their combination in the total cohort of 449 subjects, in MI(+) as  
651 well as in MI(-) subjects. B: Mutational spectrum of CHIP expressed as the proportion of mutations  
652 detected in the indicated genes. C: VAF measured for the different mutations detected in the 449  
653 subjects detected in the indicated genes. D: Prevalence of CHIP and mLOY depending on age in the  
654 total cohort (for CHIP) and in male subjects (for mLOY).

655

656 **Figure 2: CHIP and mLOY do not increase significantly the risk of incident MI, but**  
657 **could accelerate it in male subjects.**

658 Incidence of MI during follow up according to the presence of CHIP (A) or mLOY (B) in MI(-)  
659 subjects. Incidence of MI during follow up according to the presence of CHIP (C) or the  
660 combination of CHIP and mLOY (D) in male MI(-) subjects. Survival was compared between  
661 the different groups with log-rank tests.

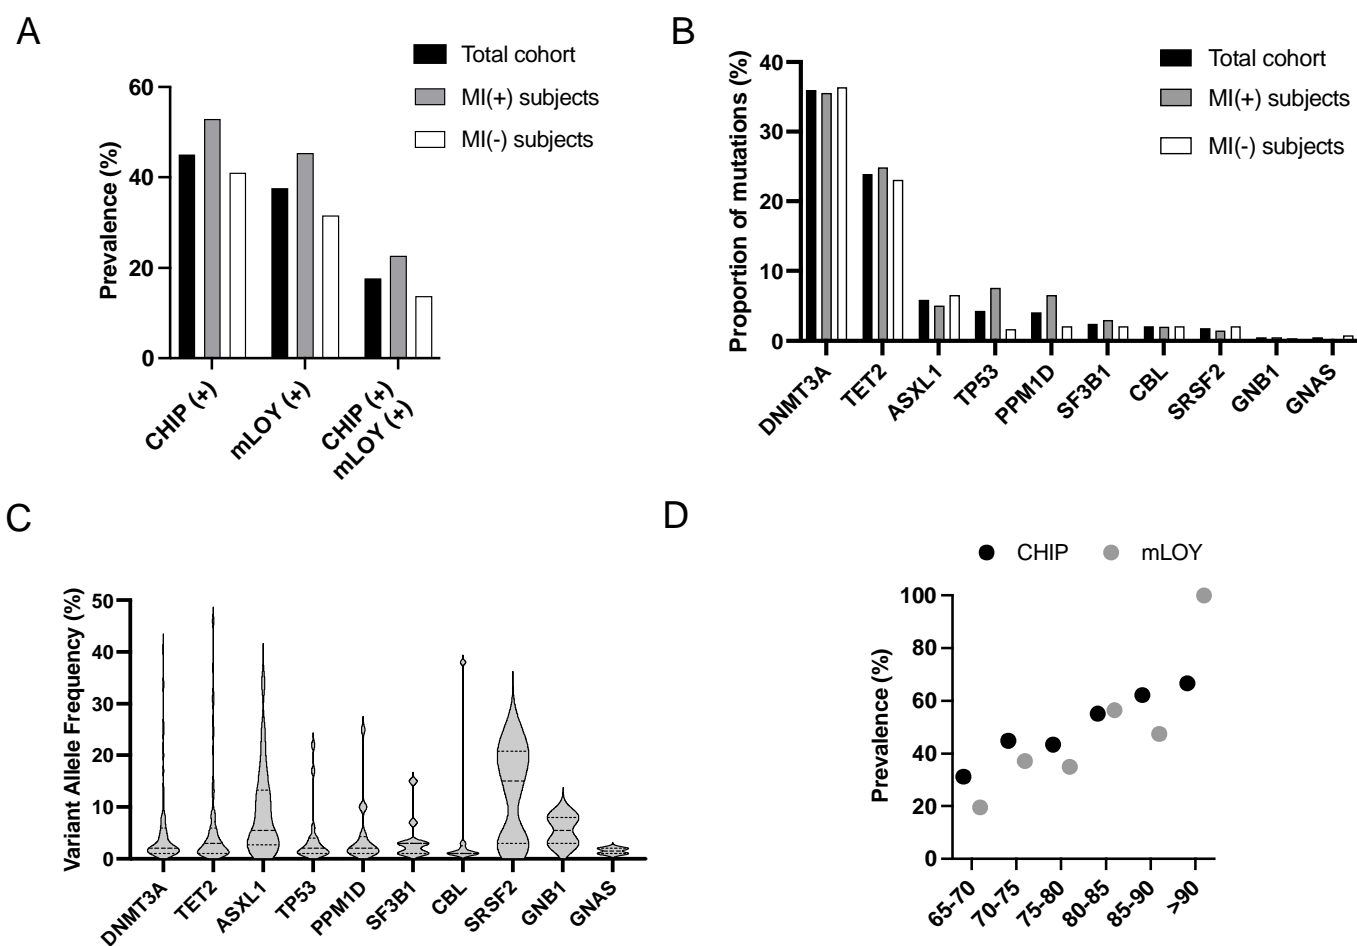

Figure 1

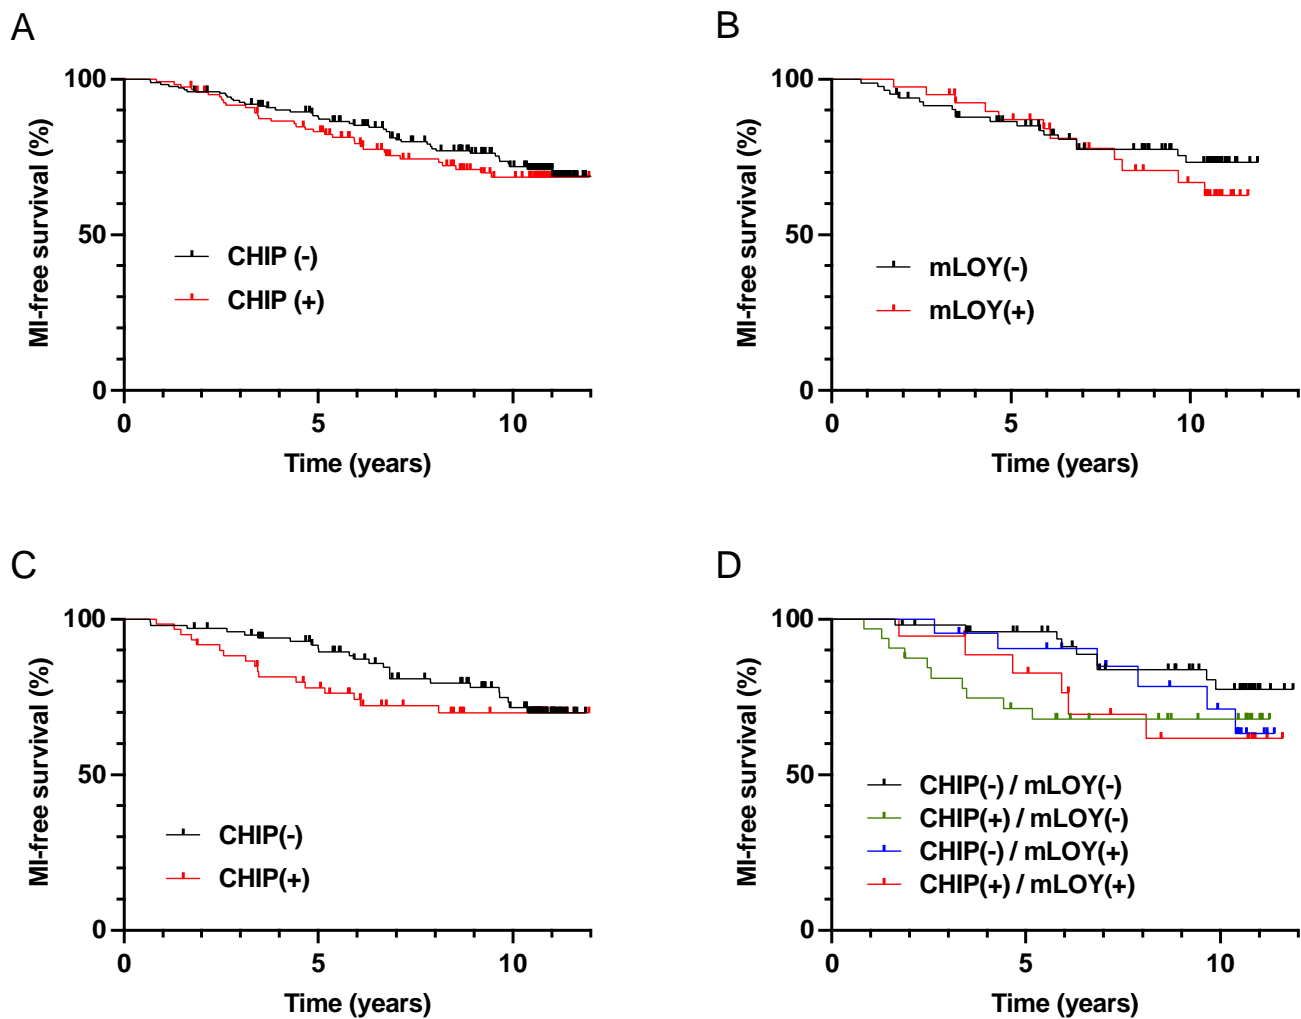

Figure 2

**Table 1: Characteristics of the population at the time of inclusion**

|                                     | All subjects<br>n = 446 | MI(+) subjects<br>n=149 | MI(-) subjects<br>n=297 | p-value                       |
|-------------------------------------|-------------------------|-------------------------|-------------------------|-------------------------------|
| Male, n (%)                         | <b>257 (57.6)</b>       | <b>98 (66)</b>          | <b>159 (54)</b>         | <b>0.015</b>                  |
| Median age, years (Q1;Q3)           | <b>76.4 (71.9;80.9)</b> | <b>82.0 (78.0;86.0)</b> | <b>73.6 (70.6;77.8)</b> | <b>P &lt; 10<sup>-4</sup></b> |
| <b>Cardiovascular risk factors</b>  |                         |                         |                         |                               |
| BMI, kg/m <sup>2</sup> (Q1;Q3)      | 25.5 (23.6;28.3)        | 25.5 (23.6;28.5)        | 25.5 (23.6;28.1)        | 0.14                          |
| Diabetes, n (%)                     | <b>94 (21.2)</b>        | <b>47 (32%)</b>         | <b>47 (16%)</b>         | <b>p &lt; 10<sup>-4</sup></b> |
| Hypertension, n (%)                 | <b>362 (82.8)</b>       | <b>107 (76.4)</b>       | <b>255 (85.9)</b>       | <b>0.020</b>                  |
| Total cholesterol, g/L (Q1;Q3)      | <b>2.08 (1.72;2.38)</b> | <b>1.45 (1.25;1.72)</b> | <b>2.23 (2.00;2.47)</b> | <b>p &lt; 10<sup>-4</sup></b> |
| LDL-c, g/L (Q1;Q3)                  | <b>1.25 (0.94;1.52)</b> | <b>0.77 (0.61;1.03)</b> | <b>1.39 (1.19;1.60)</b> | <b>p &lt; 10<sup>-4</sup></b> |
| HDL-c, g/L (Q1;Q3)                  | <b>0.56 (0.46;0.66)</b> | <b>0.47 (0.39;0.57)</b> | <b>0.59 (0.50;0.68)</b> | <b>p &lt; 10<sup>-4</sup></b> |
| Smoking, n (%)                      | 32 (7.2)                | 6 (4.4)                 | 26 (8.7)                | 0.117                         |
| <b>Prevalence of CHIP and mLOY</b>  |                         |                         |                         |                               |
| CHIP prevalence, n (%)              | 201 (45.1)              | 79 (53%)                | 122 (41%)               | 0.923                         |
| Prevalence of CHIP with VAF ≥5%     | 88 (19.7)               | 30 (20.1)               | 58 (19.5)               | 0.069                         |
| Subjects tested for mLOY, n         | 220                     | 97                      | 123                     | -                             |
| mLOY prevalence, n (%)              | 83 (37.7)               | 44 (45.4)               | 39 (31.7)               | 0.783                         |
| CHIP(+) / mLOY(+) prevalence, n (%) | 39 (17.7)               | 22 (22.7)               | 17 (13.8)               | 0.797                         |

Data are expressed as numbers and frequency or median, first and third quartiles. For quantitative values, comparisons were made by linear regression of log values adjusted for age and sex. For qualitative parameters, comparisons were made by the fisher test. For each variable, results are expressed among patients with available value.



**Table 2: CHIP and mLOY are not associated with increased hsCRP level**

|                   | hsCRP level<br>All subjects | p<br>value | hsCRP level<br>MI(+) subjects | p<br>value | hsCRP level<br>MI(-) subjects | p<br>value |
|-------------------|-----------------------------|------------|-------------------------------|------------|-------------------------------|------------|
| CHIP(-)           | 1.64 (1.00;3.69)            | 0.652      | 1.40 (1.00;4.00)              | 0.600      | 1.71 (0.97;3.22)              | 0.141      |
| CHIP(+)           | 2.00 (1.00;3.90)            |            | 2.20 (1.10;5.00)              |            | 1.63 (0.91;2.54)              |            |
| mLOY(-)           | 1.45 (0.99;2.75)            | 0.156      | 1.8 (1.0;4.8)                 | 0.149      | 1.41 (0.74;2.16)              | 0.358      |
| mLOY(+)           | 1.73 (1.01;4.00)            |            | 2.4 (1.03;4.5)                |            | 1.2 (0.99;2.99)               |            |
| CHIP (-) mLOY (-) | 1.11 (0.76;2.19)            | 0.410      | 1.00 (0.77;2.72)              | 0.430      | 1.35 (0.79;2.14)              | 0.570      |
| CHIP (+) mLOY (-) | 1.87 (1.00;3.03)            |            | 2.30 (1.35;7.35)              |            | 1.43 (0.72;2.37)              |            |
| CHIP (-) mLOY (+) | 2.20 (1.02;4.00)            |            | 2.50 (1.30;4.00)              |            | 1.37 (0.95;3.75)              |            |
| CHIP (+) mLOY (+) | 1.23 (1.01;3.80)            |            | 2.00 (1.02;4.75)              |            | 1.17 (1.03;1.73)              |            |

hsCRP Data are expressed as median, first and third quartiles. Comparisons were performed by linear regression of log values adjusted for age and sex. hsCRP levels are expressed in mg/L For each variable, results are expressed among patients with available value.

**Table 3: CHIP and mLOY are not associated with an increased atherosclerotic burden**

| Atherosclerosis burden evaluation in MI(+) subjects       |                           |                        |                        |         |                        |                        |         |
|-----------------------------------------------------------|---------------------------|------------------------|------------------------|---------|------------------------|------------------------|---------|
|                                                           | All patients<br>(n = 149) | CHIP (-)<br>(n = 70)   | CHIP (+)<br>(n = 79)   | p-value | mLOY (-)<br>(n = 53)   | mLOY (+)<br>(n = 44)   | p-value |
| Multitroncular lesions, n (%)                             | 68 (45.6)                 | 29 (41.4)              | 39 (49.4)              | 0.484   | 25 (47.2)              | 20 (45.4)              | 0.717   |
| Carotid stenosis ≥ 50%, n (%)                             | 7 (4.7)                   | 2 (2.8)                | 5 (6.3)                | 0.317   | 2 (3.8)                | 3 (6.8)                | 0.451   |
| Global atheroma volume (mm <sup>3</sup> ), median (Q1;Q3) | 499.5<br>(408.0;604.5)    | 455.0<br>(374.0;555.0) | 520.0<br>(411.5;611.5) | 0.333   | 601.0<br>(412.0;718.0) | 492.0<br>(344.5;600.5) | 0.707   |
| Atherosclerosis burden evaluation in MI(-) subjects       |                           |                        |                        |         |                        |                        |         |
|                                                           | All patients<br>(n = 297) | CHIP (-)<br>(n = 175)  | CHIP (+)<br>(n = 122)  | p-value | mLOY (-)<br>(n = 84)   | mLOY (+)<br>(n = 39)   | p-value |
| Patients with atherosclerotic plaque, n (%)               | 135 (45.4)                | 81 (46.3)              | 54 (44.3)              | 0.997   | 34 (40.5)              | 19 (48.7)              | 0.537   |
| Number of plaque, median (Q1;Q3)                          | 1 (1;2)                   | 2 (1;2)                | 1 (1;2)                | 0.258   | 2 (1;2)                | 2 (1;2)                | 0.863   |
| Intima Media Thickness (mm), median (Q1;Q3)               | 0.68<br>(0.60;0.76)       | 0.67<br>(0.60;0.76)    | 0.68<br>(0.59;0.74)    | 0.897   | 0.67<br>(0.62;0.76)    | 0.72<br>(0.57;0.83)    | 0.706   |

Data are expressed as numbers and frequency or median, first and third quartiles. For quantitative values, comparisons were made by linear regression of log values adjusted for age and sex. For qualitative parameters, comparisons were made by the fisher test and logistic regression. For each variable, results are expressed among patients with available value.
